# Supplementary material for: Stomatal immunity against fungal invasion comprises not only chitin-induced stomatal closure but also chitosan-induced guard cell death
Source: PubMed Central journal article supplement — Proc Natl Acad Sci U S A. 2020 Aug 10;117(34):20932–42. doi: 10.1073/pnas.1922319117 (PMC7456093; doi:10.1073/pnas.1922319117), 2020-08-10
Supplement: pnas.1922319117.sapp.pdf [file pnas.1922319117.sapp.pdf]

**A**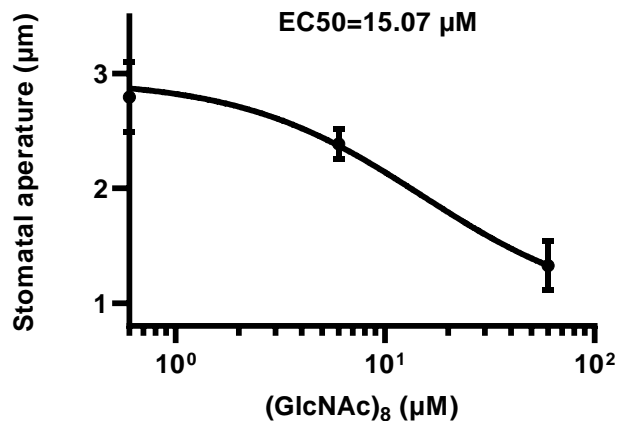**B**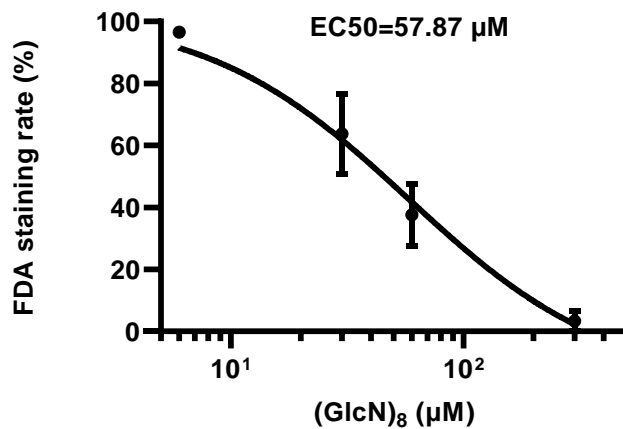

**Figure S1. EC50 values for (GlcNAc)<sub>8</sub>-induced stomatal closure and (GlcN)<sub>8</sub>-induced reduction of FDA staining rate**

The data of stomatal closure and reduction of FDA staining rate are from Figure 1A and Figure 7A, respectively. The dose response curves and EC50 values were calculated via non-linear regression using Prism 8.2.1 software (GraphPad software).

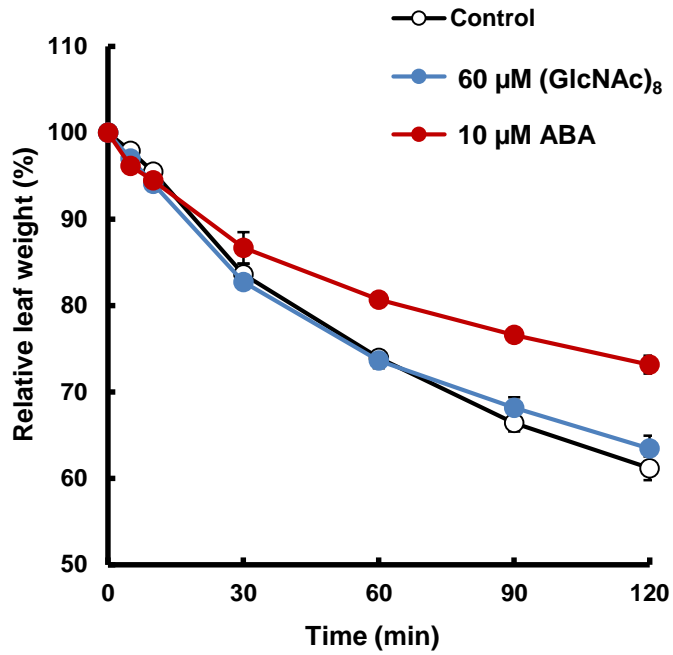

**Figure S2. Water loss from detached leaves treated with ABA and (GlcNAc)<sub>8</sub>**

Relative water loss was represented by the weight of the leaves at various time points divided by the original weight. Data are mean  $\pm$  SEM ( $n=3$ ).

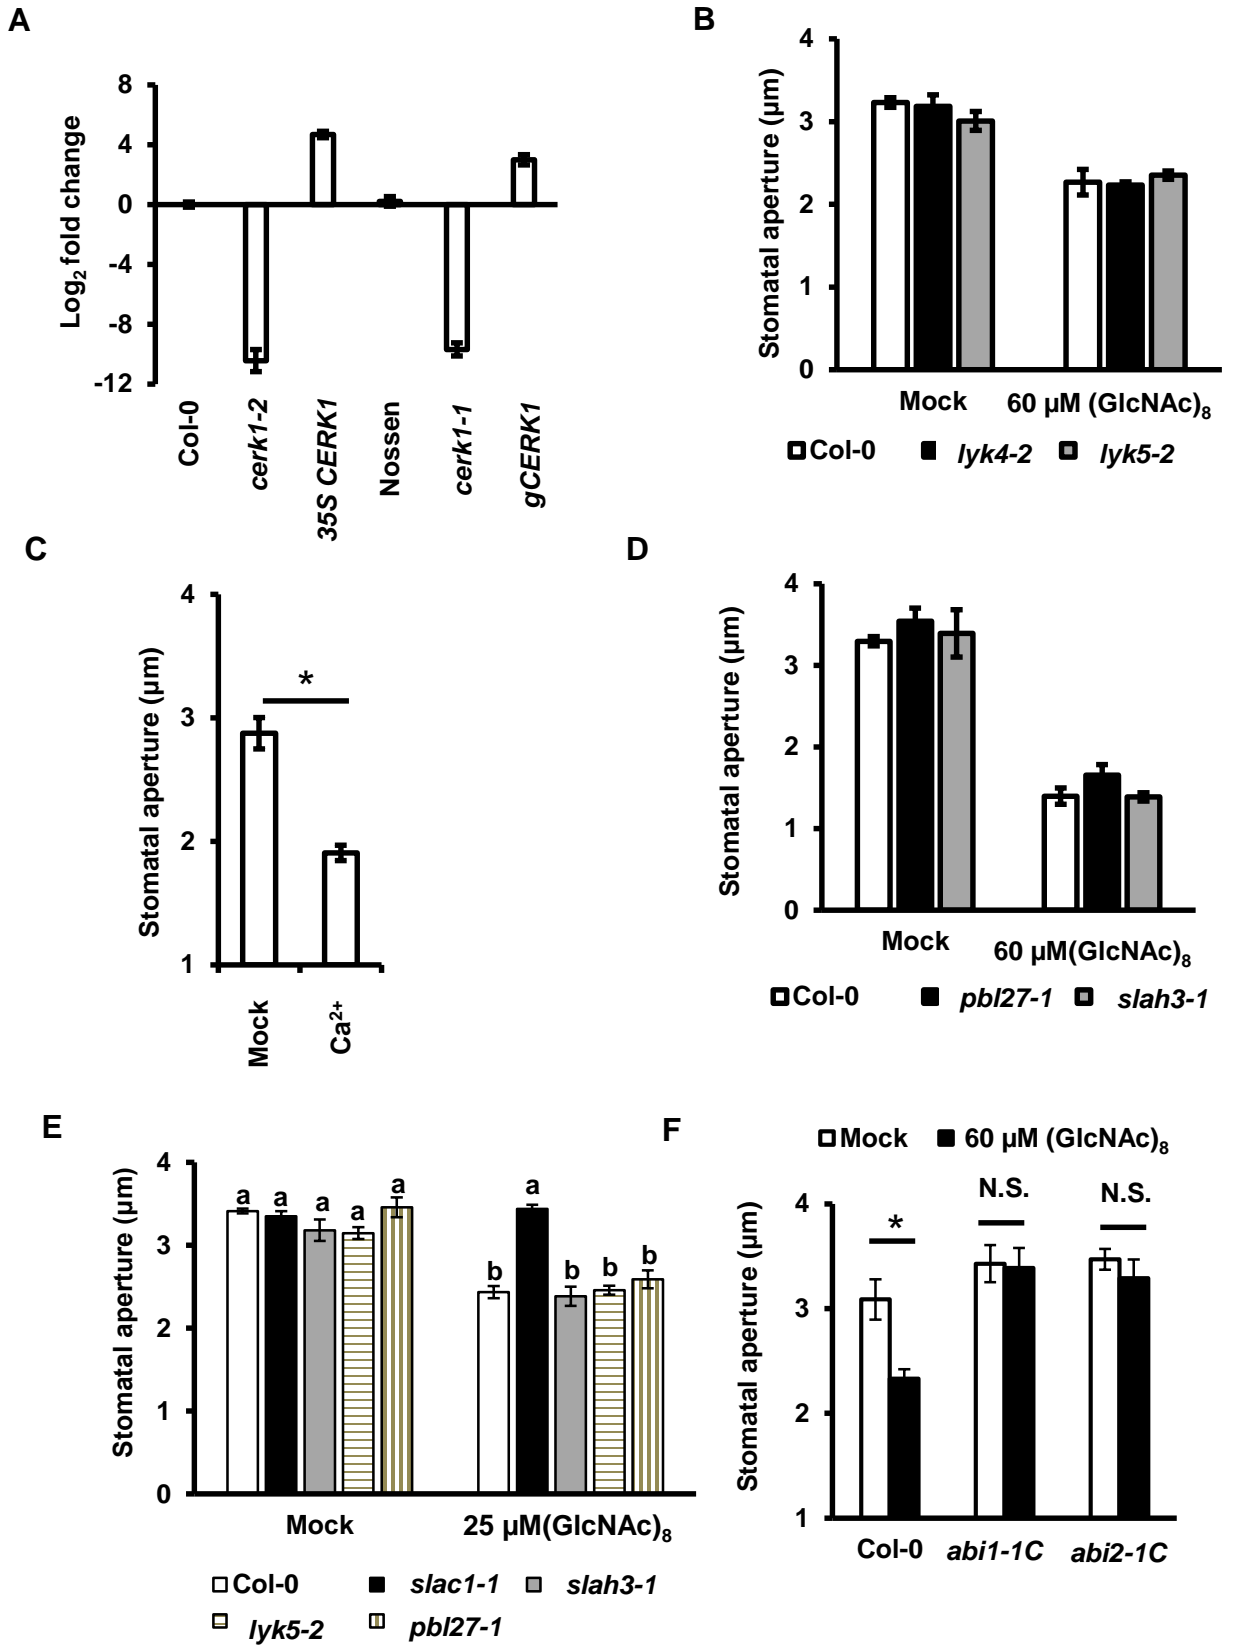

**Figure S3. (GlcNAc)<sub>8</sub>-induced stomatal closure in *lyk4*, *lyk5*, *pbl27*, *slah3*, *abi1-1C* and *abi2-1C***

(A) Transcript levels of *CERK1*. The levels of *CERK1* transcript with *UBQ10* as a reference in leaves of different genotypes were normalized to that of Col-0. Data are mean  $\pm$  SEM ( $n=3$ ).

(B) Stomatal closure induced by 60  $\mu$ M (GlcNAc)<sub>8</sub> in Col-0, *lyk4-2* and *lyk5-2*. Averages from three independent experiments (90 total stomata per bar) are shown. Data are mean  $\pm$  SEM ( $n=3$ ).

(C) Effect of 1mM Ca<sup>2+</sup> on *cerk1-2* stomatal aperture.

(D) Stomatal closure induced by 60  $\mu$ M (GlcNAc)<sub>8</sub> in Col-0, *pbl27-1* and *slah3-1*. Averages from three independent experiments (90 total stomata per bar) are shown. Data are mean  $\pm$  SEM ( $n=3$ ).

(E) Stomatal closure induced by 25  $\mu$ M (GlcNAc)<sub>8</sub> in Col-0, *slac1-1*, *slah3-1*, *lyk5-2* and *pbl27-1*. Averages from four independent experiments (120 total stomata per bar) are shown. Data are mean  $\pm$  SEM ( $n=4$ ). Different letters indicate statistical significance ( $P<0.05$ , ANOVA with Tukey's test).

(F) Stomatal closure induced by 60  $\mu$ M (GlcNAc)<sub>8</sub> in Col-0, *abi1-1C* and *abi2-1C*. Averages from three independent experiments (90 total stomata per bar) are shown. Data are mean  $\pm$  SEM ( $n=3$ ). Student's t test: \*,  $P<0.05$ . N.S., No significant difference.

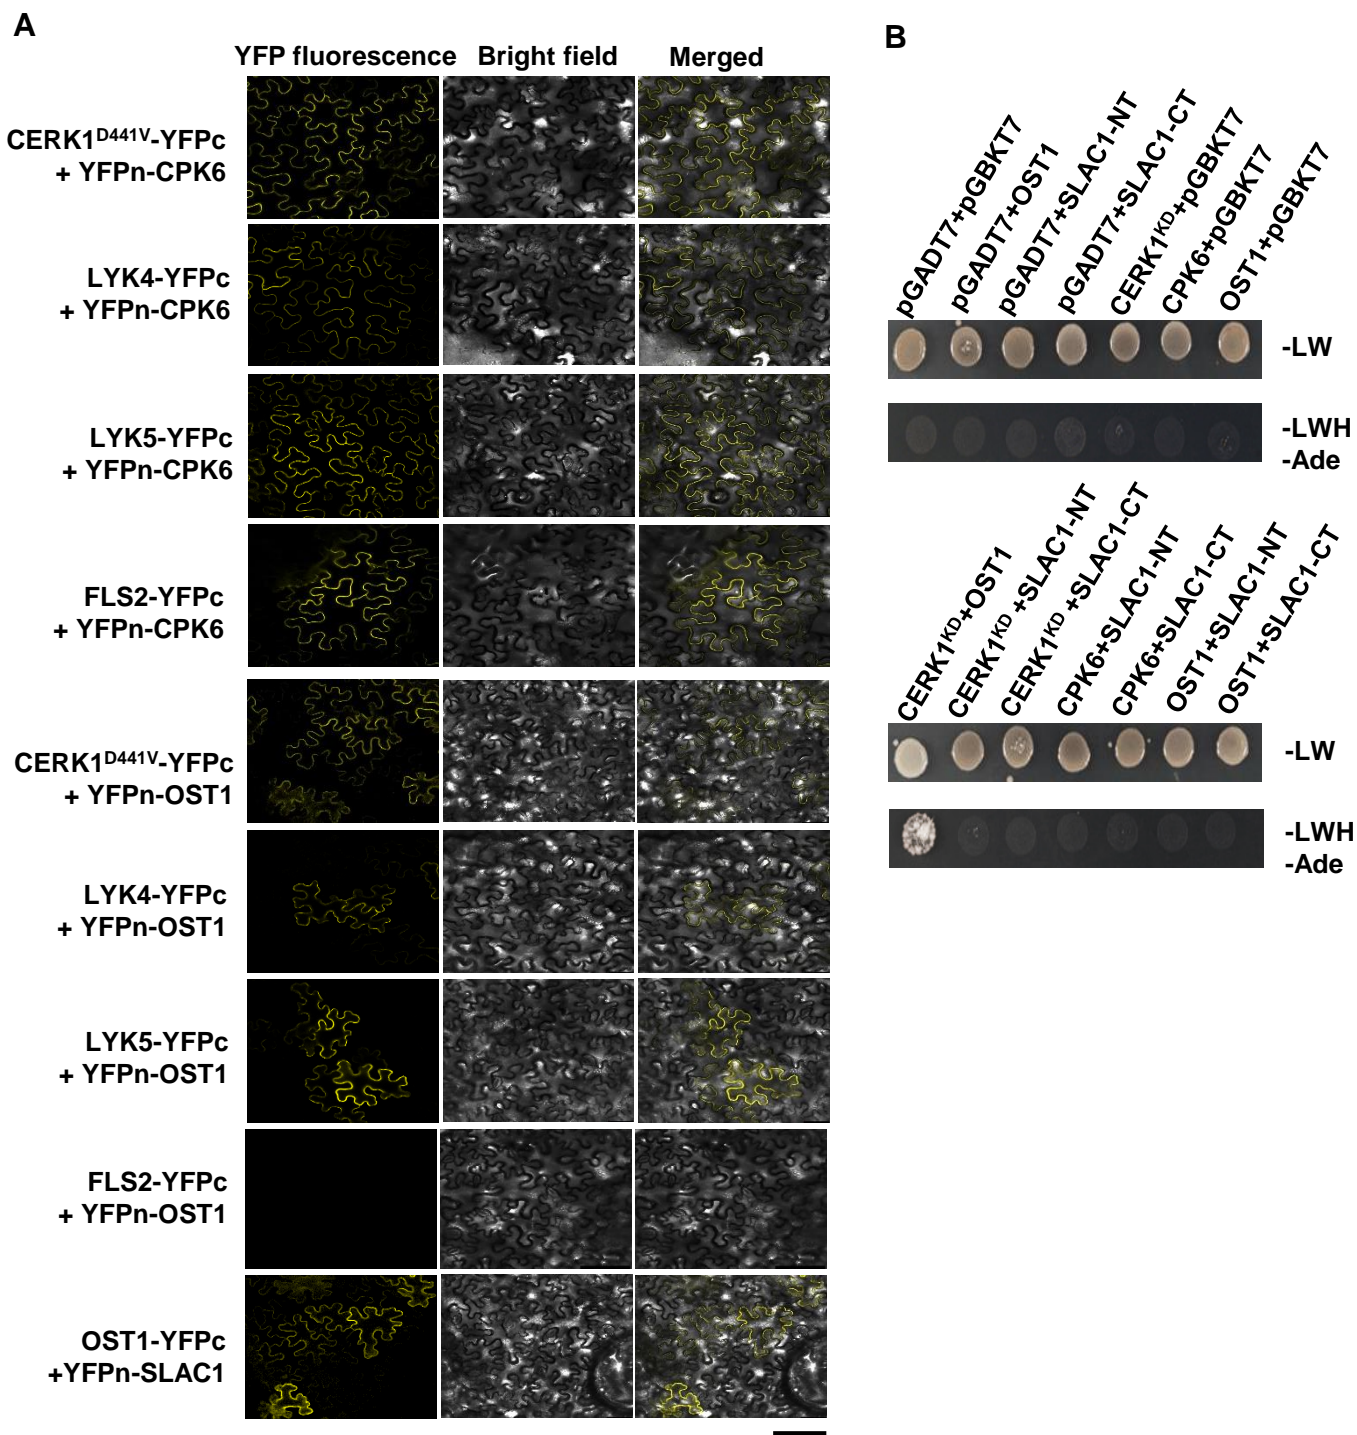

**Figure S4. Additional BiFC and yeast-two hybrid experiments**

(A) Confocal microscopy of *N. benthamiana* leaves transiently expressing the indicated split-YFP constructs. Representative images are shown. Scale bar, 100  $\mu$ m.

(B) Yeast two-hybrid assays with the indicated expressing combinations.

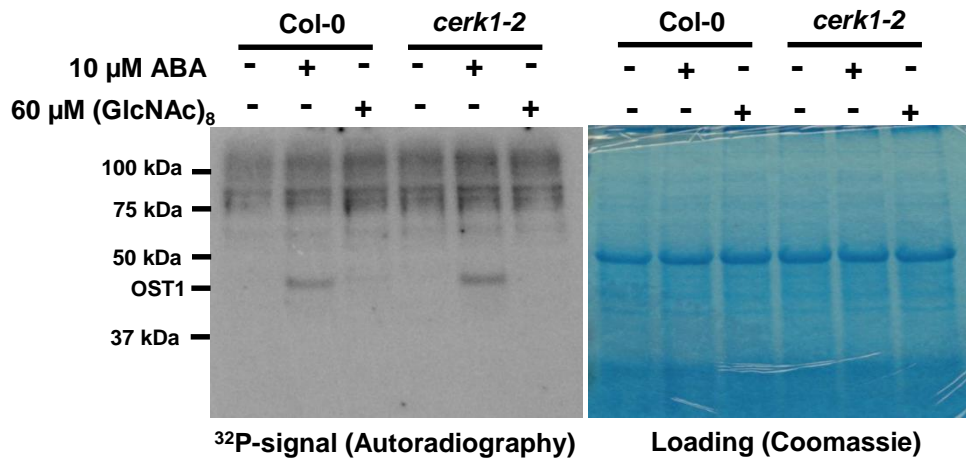

**Figure S5. Kinase activity of OST1 in response to ABA and (GlcNAc)<sub>8</sub>**  
 In-gel kinase assays with Histone-III as substrate for whole seedling protein. The experiment has been repeated three times with similar results.

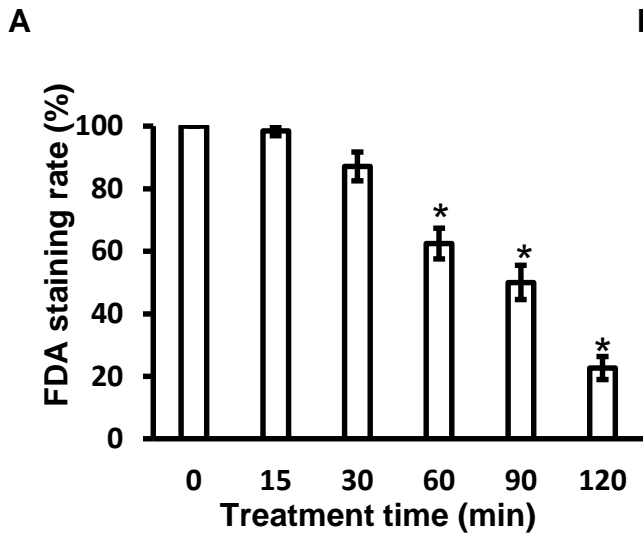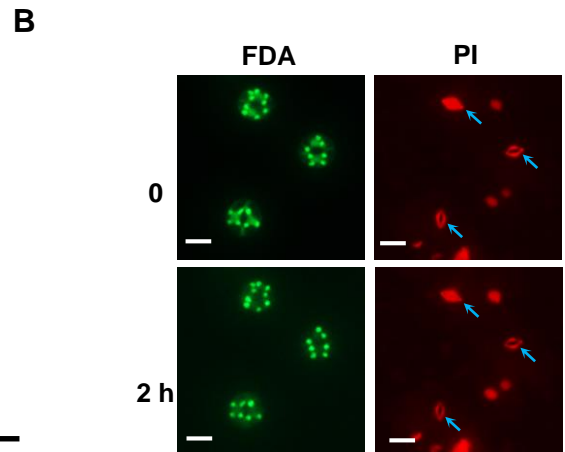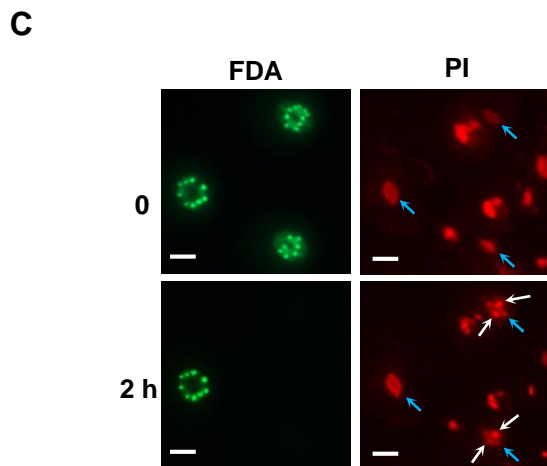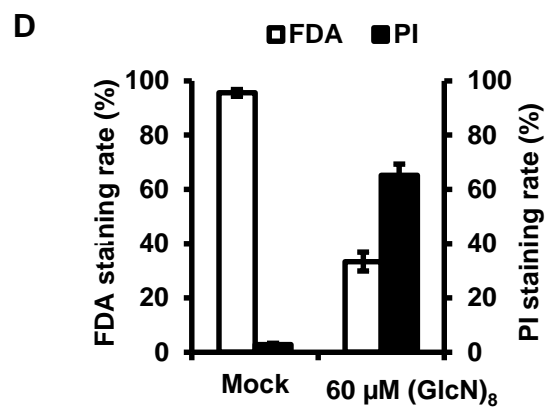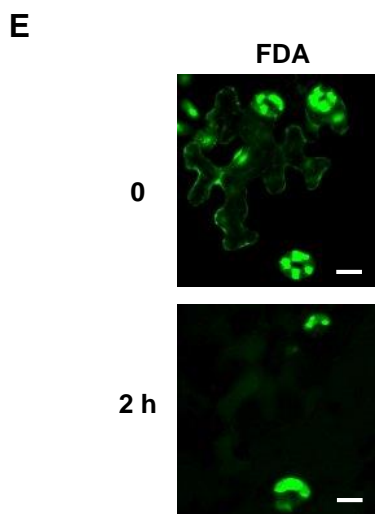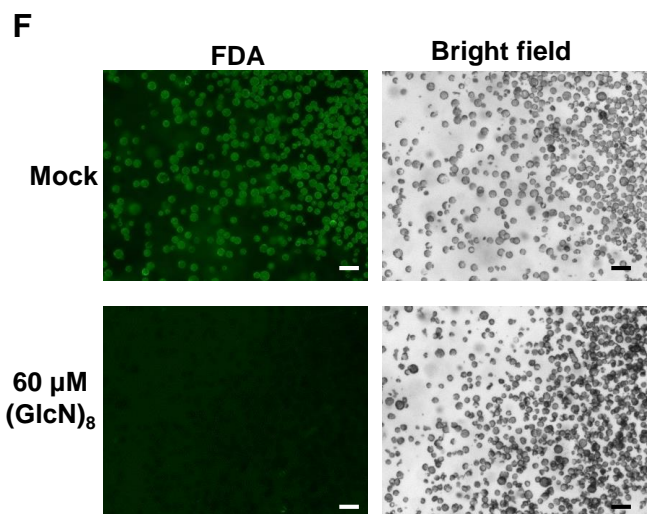

### Figure S6. (GlcN)<sub>8</sub>-induced cell death in Col-0

(A) Time course of (GlcN)<sub>8</sub>-induced guard cell death. Guard cell death was evaluated by FDA staining. The time starting (GlcN)<sub>8</sub> treatment was considered as 0 time point. Averages from three independent experiments (360 guard cells in total) are shown. Data are mean  $\pm$  SEM ( $n=3$ ). Asterisks indicate statistical significance compared to that of 0 time point ( $P<0.05$ , Student's t test).

(B-D) FDA and PI double staining of guard cell treated with 60  $\mu$ M (GlcN)<sub>8</sub>. Epidermal tissues were double stained with FDA and PI to find live guard cells. After 2 h (GlcN)<sub>8</sub> treatment, the same epidermal tissues were stained with FDA and PI again to distinguish live and dead guard cells. The same guard cells before and after (GlcN)<sub>8</sub> treatment were used for quantification. Representative staining images were shown in (B) for Mock treatment and (C) for (GlcN)<sub>8</sub> treatment. Blue arrowheads, stomatal pores stained by PI; white arrowheads, nuclei of dead guard cells stained by PI; scale bar, 20  $\mu$ m. Quantification of staining rates was shown in (D). Averages from three independent experiments (200 to 250 guard cells per bar) are shown. Data are mean  $\pm$  SEM ( $n=3$ ).

(E) Effect of (GlcN)<sub>8</sub> on leaf epidermal cell viability. The same cells were imaged before and after treatment of 60  $\mu$ M (GlcN)<sub>8</sub>. Scale bar, 20  $\mu$ m.

(F) Effect of (GlcN)<sub>8</sub> on mesophyll protoplast viability. Mesophyll protoplasts were stained with FDA after 2 h (GlcN)<sub>8</sub> treatment. Scale bar, 100  $\mu$ m.



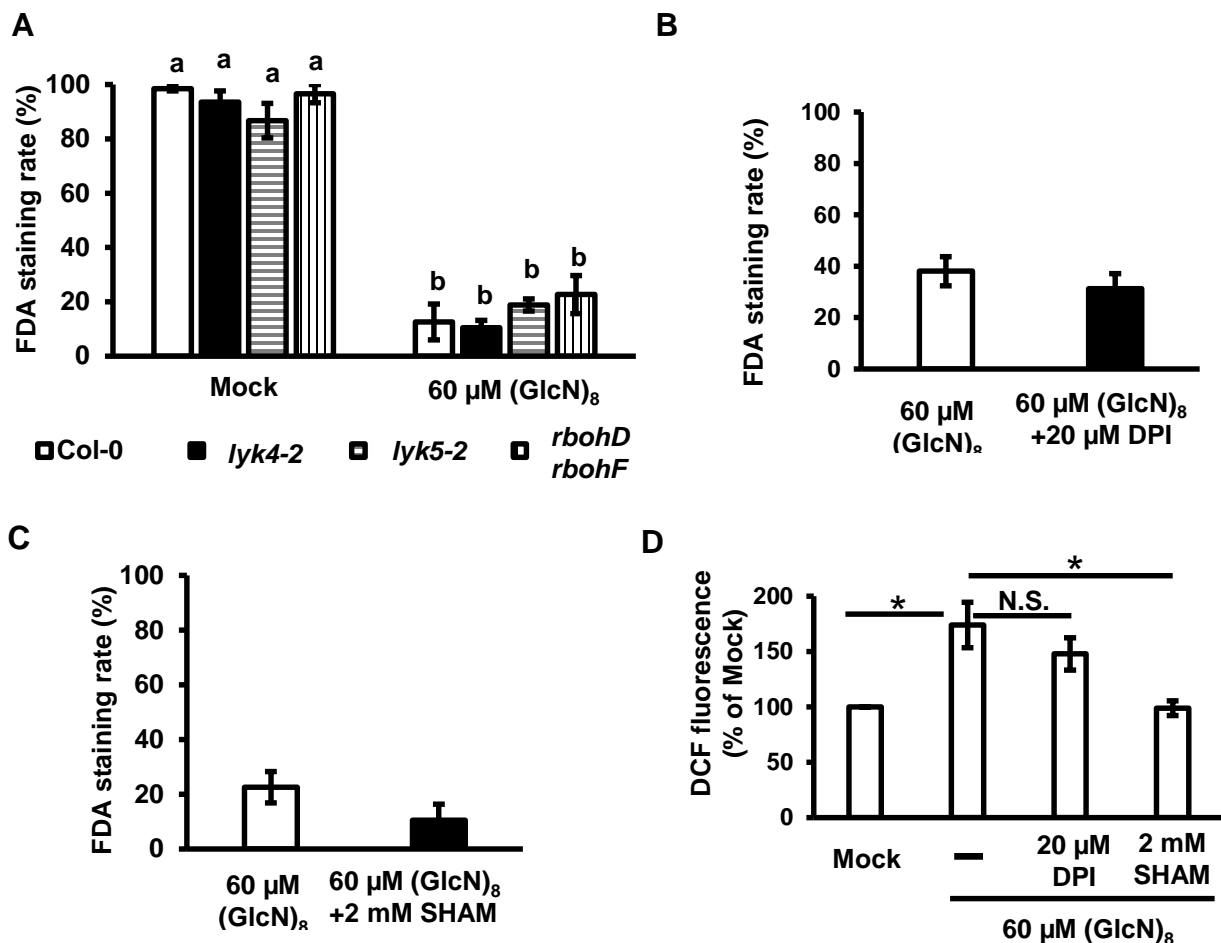

**Figure S7. Effect of DPI, SHAM, *lyk4*, *lyk5* and *rbohD rbohF* mutations on (GlcN)<sub>8</sub>-induced guard cell death**

(A) Effect of *lyk4*, *lyk5* and *rbohD rbohF* mutations on (GlcN)<sub>8</sub>-induced guard cell death. Averages from three independent experiments (200 to 250 guard cells per bar) are shown. Data are mean  $\pm$  SEM ( $n=3$ ). Different letters indicate statistical significance ( $P<0.05$ , ANOVA with Tukey's test).

(B and C) Effect of DPI and SHAM on (GlcN)<sub>8</sub>-induced guard cell death. Averages from three independent experiments (200 to 250 guard cells per bar) are shown. Data are mean  $\pm$  SEM ( $n=3$ ).

(D) ROS accumulation induced by (GlcN)<sub>8</sub> in guard cells. ROS accumulation was expressed as the percentage of DCF fluorescence levels to that of Mock treatment. Averages from three independent experiments (more than 120 total guard cells per bar) are shown. Data are mean  $\pm$  SEM ( $n=3$ ). Student's t test: \*,  $P<0.05$ . N.S., No significant difference.

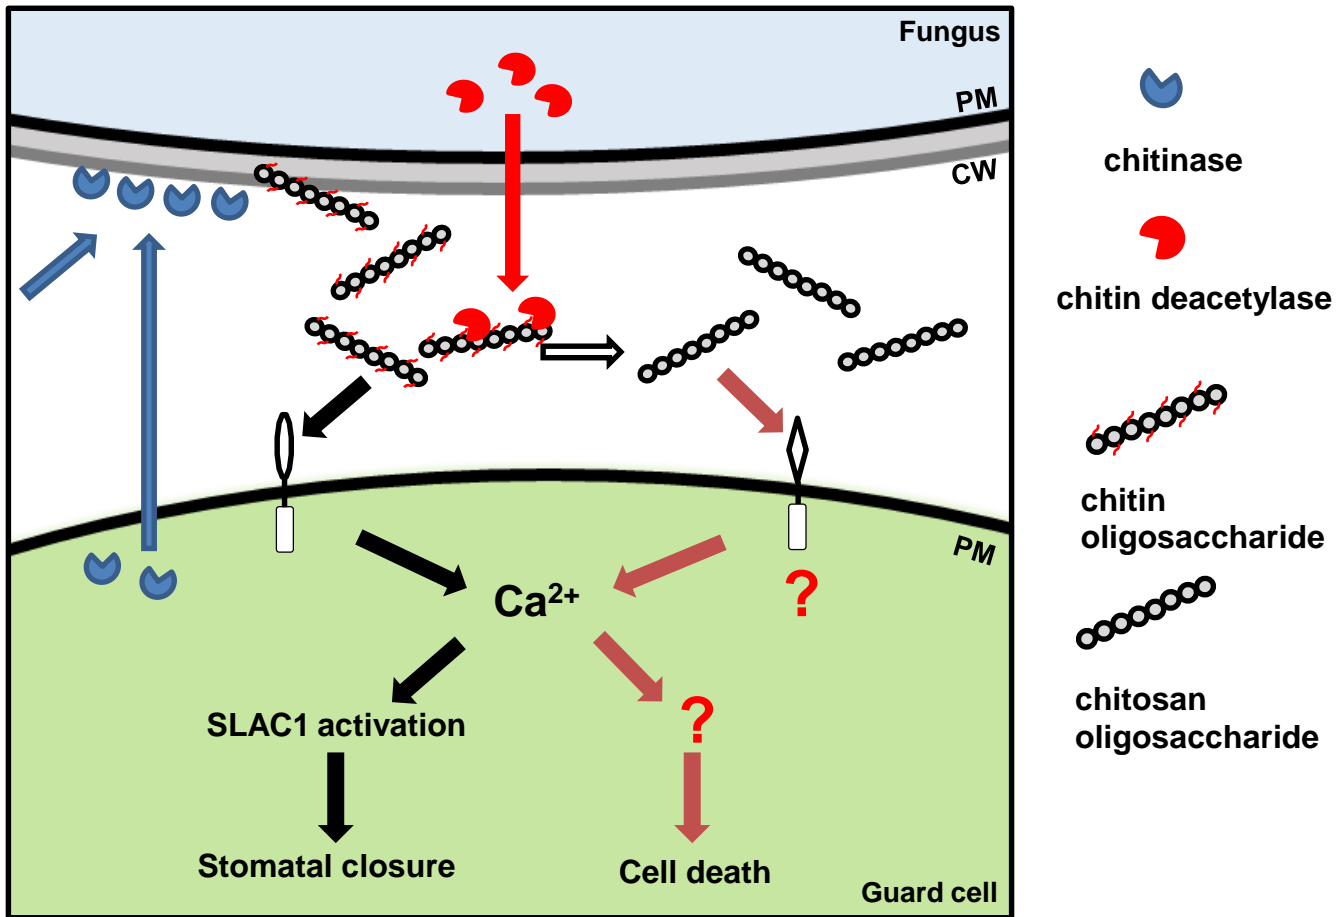

**Figure S8. Proposed model of guard cell-fungus interaction**

During fungal penetration through stomata, chitin in the cell wall of fungi is digested by chitinases preexisted in the apoplast or secreted by plant cells, leading to the release of CTOS. Guard cells then perceive the CTOS through its receptor, CERK1, which induces SLAC1 activation through a  $\text{Ca}^{2+}$ -dependent pathway and consequently stomatal closure to prevent fungal invasion. On the other hand, fungi secrete chitin deacetylases, converting CTOS to CSOS, to evade CTOS-triggered immune response. When CSOS accumulates over a threshold, it is sensed by yet-unknown receptors in the plasma membrane, which triggers cell death also in a  $\text{Ca}^{2+}$ -dependent manner to inhibit fungal infection. PM, plasma membrane; CW, cell wall. For simplicity, plant cell wall is not illustrated.

**Table S1. Primers for vector construction**

| <b>Assay</b>    | <b>Constructs</b>             | <b>Primer name</b>         | <b>Primer sequence (5'→3')</b>               |                                            |
|-----------------|-------------------------------|----------------------------|----------------------------------------------|--------------------------------------------|
| BiFC            | pXY106-CPK6                   | CPK6-BclI-F                | CGTGATCAATGGGCAATTCATG<br>TCGTGG             |                                            |
|                 |                               | CPK6-Sall-R                | CGCGTCGACCTACACATCTCTC<br>ATGCTGAT           |                                            |
|                 | pXY106-OST1                   | OST1-BamHI-F               | CGGGATCCATGGATCGACCAG<br>CAGTGA              |                                            |
|                 |                               | OST1-Sall-R                | CGCGTCGACTCACATTGCGTAC<br>ACAATCTC           |                                            |
|                 | pXY106-SLAC1                  | SLAC1-BamHI-F              | CGGGATCCATGGAGAGGAAAC<br>AGTCAAAT            |                                            |
|                 |                               | SLAC1-Sall-R               | CGCGTCGACTCAGTGATGCGA<br>CTCTTCCTC           |                                            |
|                 | pXY104-LYK4                   | LYK4-Sal1-F                | GGGATCCTCTAGAGTCGACAT<br>GATCTCGTTTTTCATTTT  |                                            |
|                 |                               | LYK4-Sal1-R                | CGCTGCCACCGCCGTCGACGT<br>ACGACGATTCTTCCCAG   |                                            |
|                 | pXY104-LYK5                   | LYK5-Sal1-F                | GGGATCCTCTAGAGTCGACAT<br>GGCTGCGTGTACTCTC    |                                            |
|                 |                               | LYK5-Sal1-R                | CGCTGCCACCGCCGTCGACGT<br>TGCCAAGAGAGCCGGAAC  |                                            |
|                 | pXY104-FLS2                   | FLS2-Sal1-F                | GGGATCCTCTAGAGTCGACAT<br>GAAGTTACTCTCAAAG    |                                            |
|                 |                               | FLS2-Sal1-R                | CGCTGCCACCGCCGTCGACAA<br>CTTCTCGATCCTCGTTAC  |                                            |
|                 | pXY104-CERK1 <sup>D441V</sup> | CERK1-BamHI-F1             | CGGGATCCATGAAGCTAAAGAT<br>TTCTCTAAT          |                                            |
|                 |                               | CRRK1-Sall-R1              | CGCGTCGACCCGCGCGGACAT<br>AAGACTGAC           |                                            |
|                 |                               | CERK1-F2                   | GTTTATGTCCATAGGGTCATTAA<br>ATCTGCCAAT        |                                            |
|                 |                               | CERK1-R2                   | ATTGGCAGATTTAATGaCCCTAT<br>GGACATAAAC        |                                            |
|                 | Yeast two-hybrid              | pGADT7-CREK1 <sup>KD</sup> | CREK1 <sup>KD</sup> -EcoRI-F                 | CATGGAGGCCAGTGAATTCAT<br>TTGTCTTTTTAAGATTG |
|                 |                               |                            | CREK1 <sup>KD</sup> -EcoRI-R                 | GCCCACCCGGGTGGAATTCCC<br>GGCCGGACATAAGACTG |
| pGBKT7-CPK6     |                               | CPK6-EcoRI-F               | GCCATGGAGGCCGAATTCATG<br>GGCAATTCATGTCGTG    |                                            |
|                 |                               | CPK6-Sall-R                | TGCGGCCGCTGCAGGTCGACG<br>CACATCTCTCATGCTGATG |                                            |
| pGBKT7-OST1     |                               | OST1-EcoRI-F               | GCCATGGAGGCCGAATTCATG<br>GATCGACCAGCAGTGA    |                                            |
|                 |                               | OST1-Sall-R                | TGCGGCCGCTGCAGGTCGACG<br>CATTGCGTACACAATCTC  |                                            |
| pGBKT7-SLAC1 NT |                               | SLAC1 NT-EcoRI-F           | GCCATGGAGGCCGAATTCATG<br>GAGAGGAAACAGTCAAATG |                                            |
|                 |                               | SLAC1 NT-Sall-R            | TGCGGCCGCTGCAGGTCGACG<br>TAGGAGAAACGGCCATTG  |                                            |
| pGBKT7-SLAC1 CT |                               | SLAC1 CT-EcoRI-F           | GCCATGGAGGCCGAATTCATTG<br>TCTGGCAAACGTTG     |                                            |
|                 |                               | SLAC1 CT-Sall-R            | TGCGGCCGCTGCAGGTCGACG<br>GTGATGCGACTCTTCCTC  |                                            |
